# Supplementary material for: New Advances in the Determination of Free and Bound Phenolic Compounds of Banana Passion Fruit Pulp (Passiflora tripartita, var. Mollissima (Kunth) L.H. Bailey) and Their In Vitro Antioxidant and Hypoglycemic Capacities
Source: PubMed Central journal article supplement (PMC7402170; doi:10.3390/antiox9070628), 2020-07-17

# Supplementary Figure. Base Peak Chromatogram of free (FPC) and bound (BPC) phenolic compounds in banana passion fruit obtained by HPLC-ESI-TOF-MS

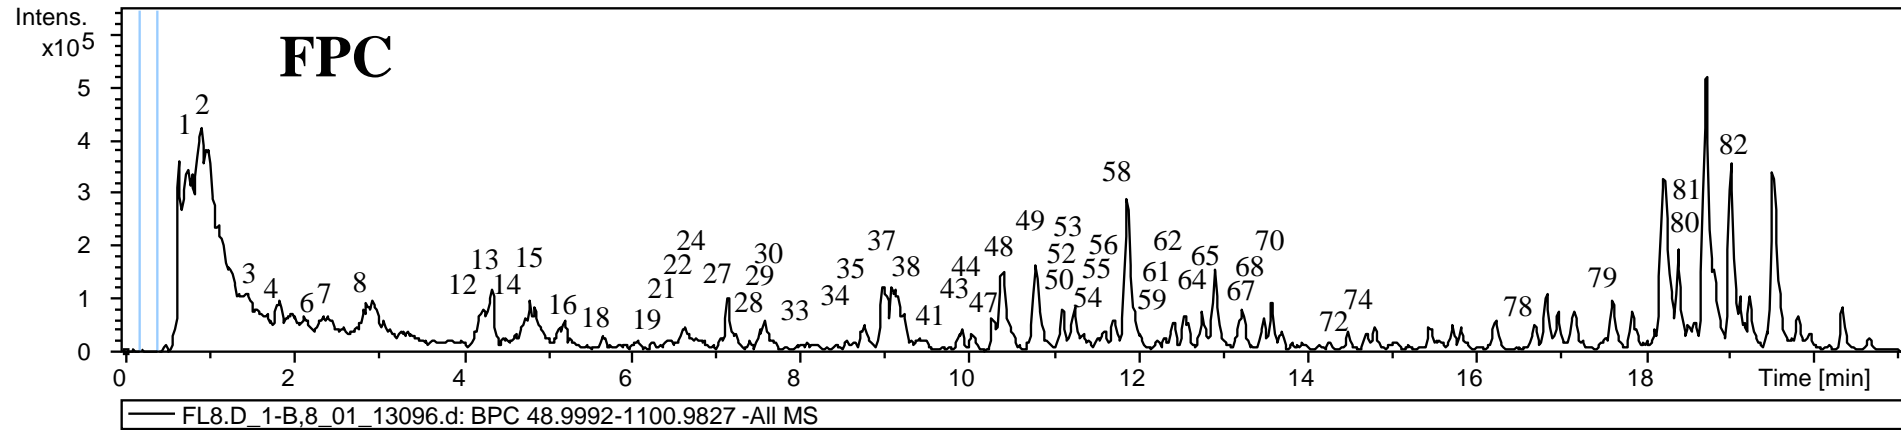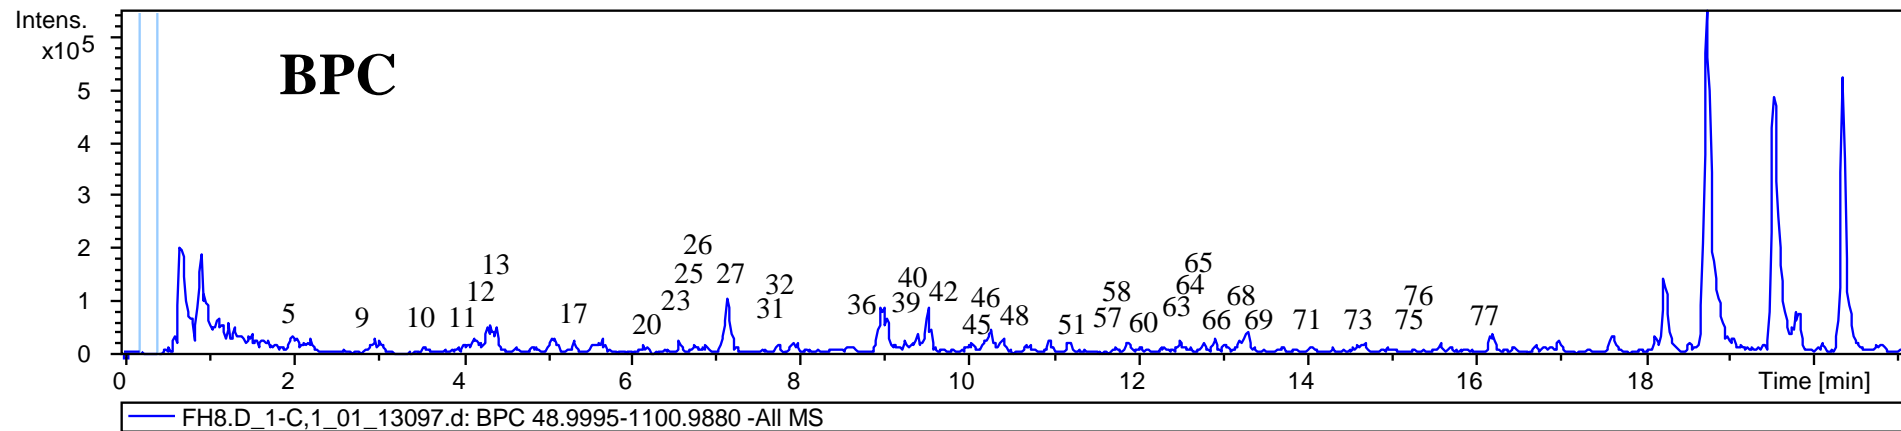

Supplement: antioxidants-09-00628-s001.pdf [file antioxidants-09-00628-s001.pdf]
